# Supplementary material
Source: Research Square preprint supplement (doi:10.21203/rs.3.rs-8871975/v1)
Supplement: Supplementary file 1 [file b01e3045504396d99f892f76.docx]

****Supplementary Material****

****Supplement 1.** qPCR Primer Sequences**

*HNRNPC forward: 5'-GTCCCCTCTACTCAGCTCCT-3', reverse: 5'-GAAGCCACTTTTGCCCCTTC-3'*

*FOXO1 forward: 5'-CCCAGGCCGGAGTTTAACTA-3', reverse: 5'-GCTGGTCTGGAAGTGCAATA-3'*

*IL-1B forward: 5'-GCCCATCCTCTGTGACTCAT-3', reverse: 5'-AGGCCACAGGTATTTTGTCG-3'*

*GAPDH forward: 5'-GCACCGTCAAGGCTGAGAAC-3', reverse: 5'-TGGTGAAGACGCCAGTGGA-3'*
